# Supplementary material for: Injectable hydrogel microspheres with self-renewable hydration layers alleviate osteoarthritis
Source: PubMed Central journal article supplement — Sci Adv. 2022 Feb 2;8(5):eabl6449. doi: 10.1126/sciadv.abl6449 (PMC8809544; doi:10.1126/sciadv.abl6449), 2022-02-02
Supplement: sciadv.abl6449_sm.pdf [file sciadv.abl6449_sm.pdf]

Supplementary Materials for  
**Injectable hydrogel microspheres with self-renewable hydration layers  
alleviate osteoarthritis**

Yiting Lei, Yuping Wang, Jieliang Shen, Zhengwei Cai, Chen Zhao, Hong Chen, Xiaoji Luo,  
Ning Hu\*, Wenguo Cui\*, Wei Huang\*

\*Corresponding author. Email: [huncqjoint@yeah.net](mailto:huncqjoint@yeah.net) (N.H.); [wgcui80@hotmail.com](mailto:wgcui80@hotmail.com) (W.C.);  
[huangw511@163.com](mailto:huangw511@163.com) (W.H.)

Published 2 February 2022, *Sci. Adv.* **8**, eabl6449 (2022)  
DOI: 10.1126/sciadv.abl6449

**This PDF file includes:**

Figs. S1 to S9  
Table S1

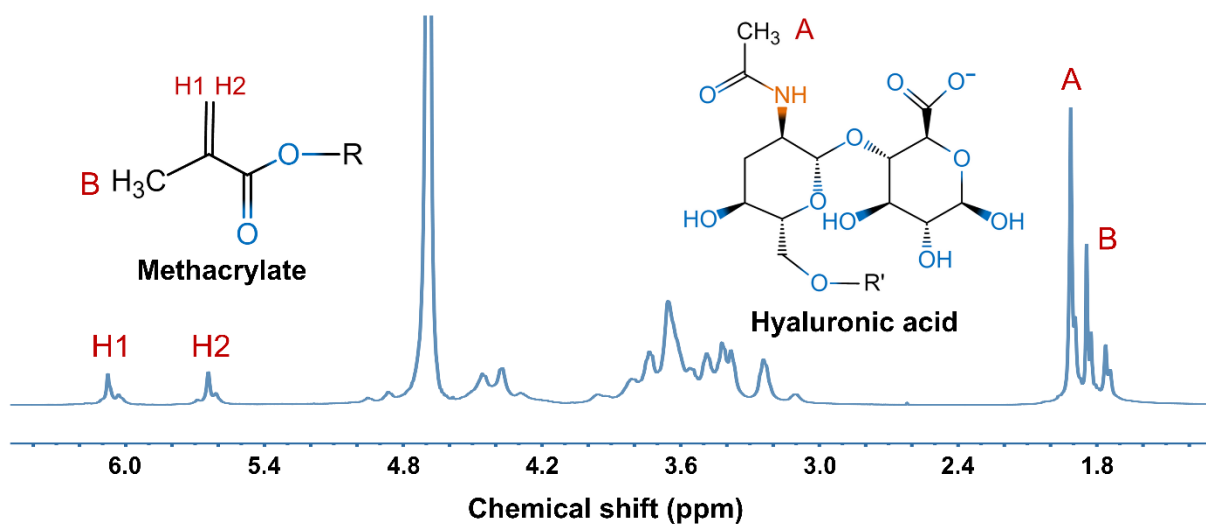

fig. S1. The <sup>1</sup>H NMR spectra of HAMA.

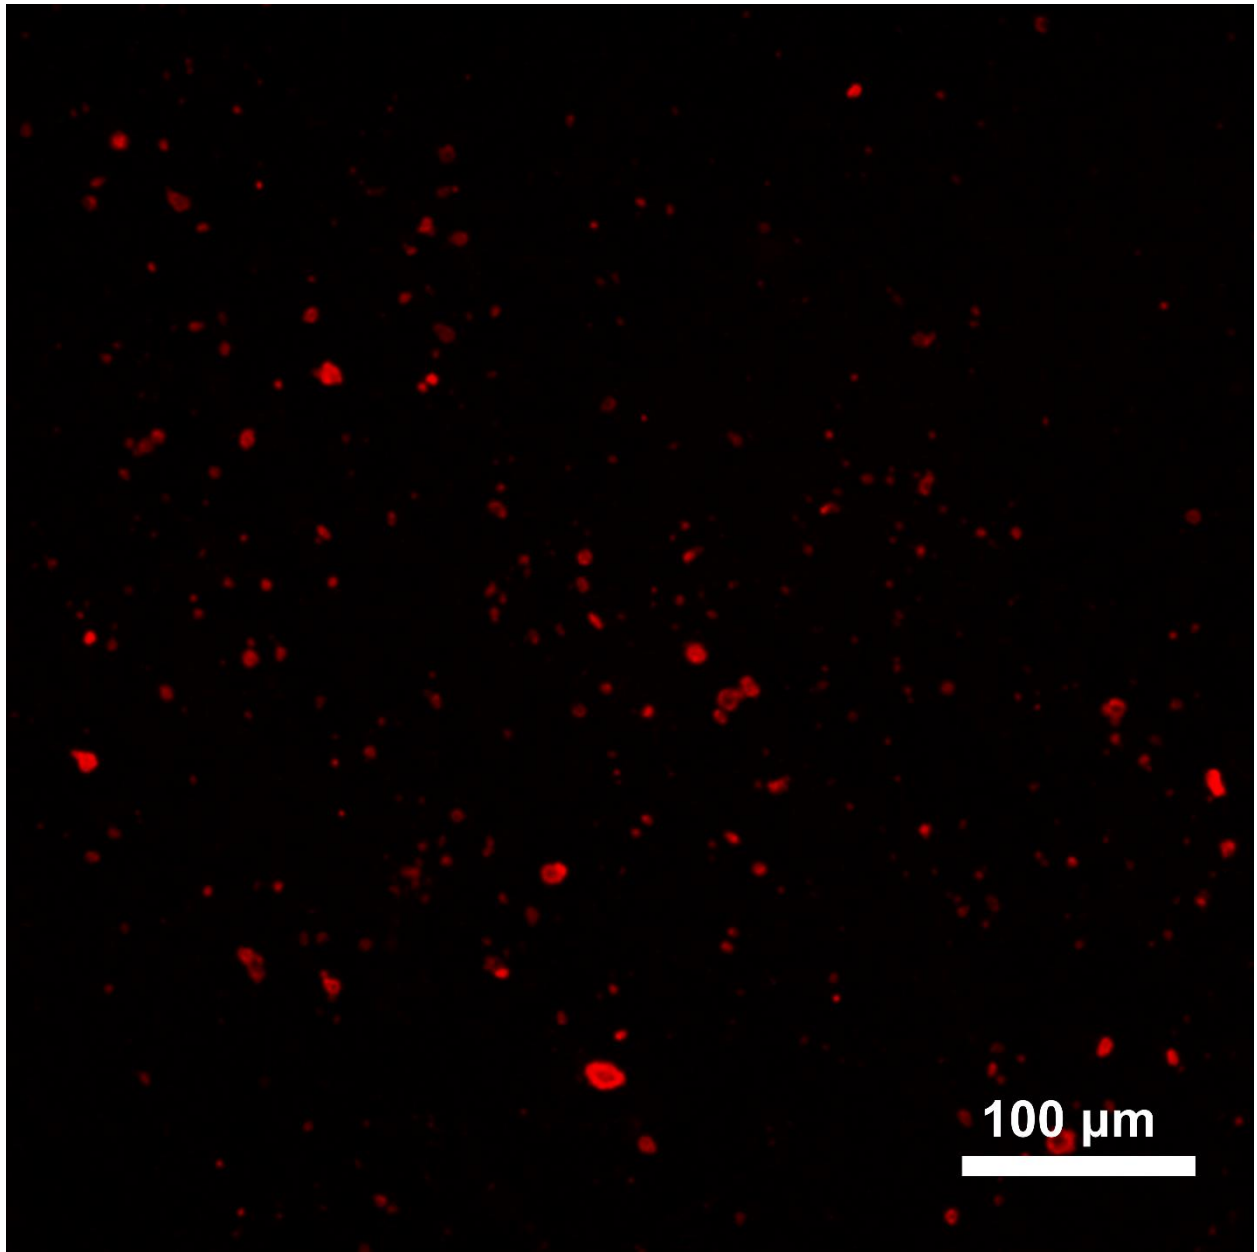

**fig. S2. LSCM image of the cartilage section incubated with Dil-labelled cationic liposomes.**

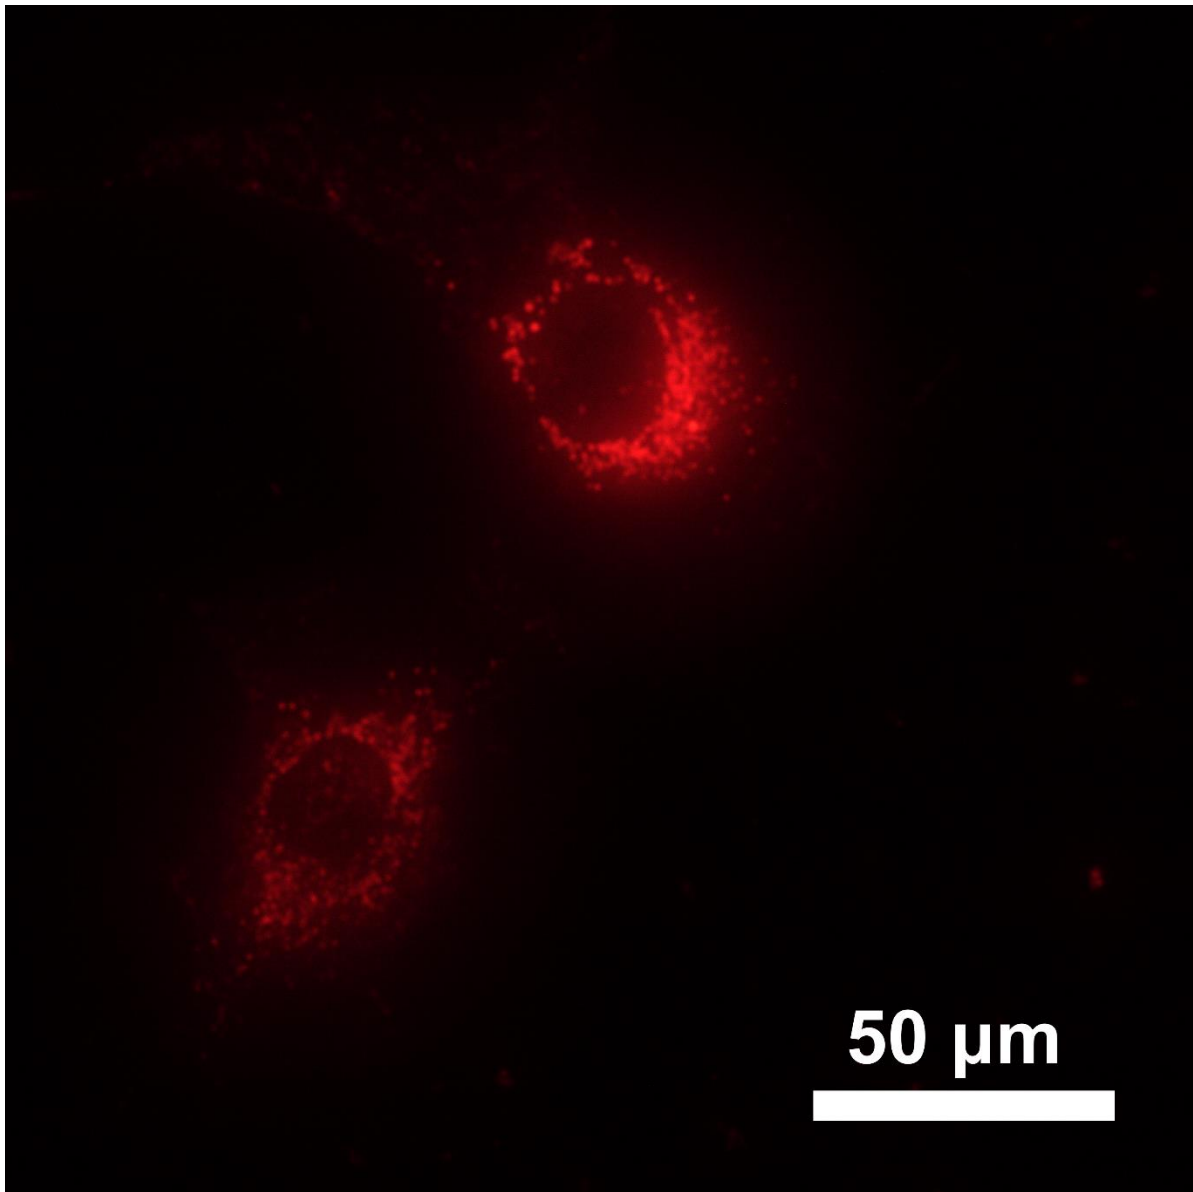

**fig. S3.** LSCM image of the chondrocytes incubated with Dil-labelled cationic liposomes.

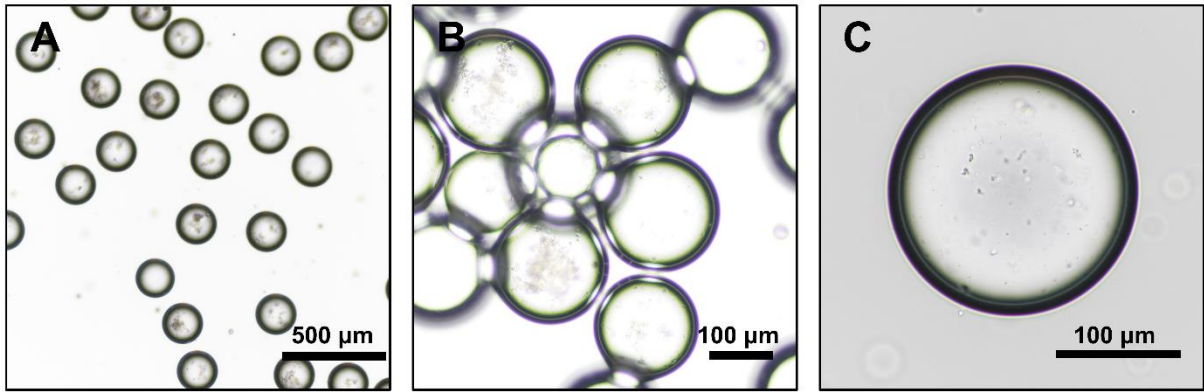

**fig. S4. Characterization of pre-gel droplets: (A-B) dispersed pre-gel droplets, and (C) mono-pre-gel droplet.**

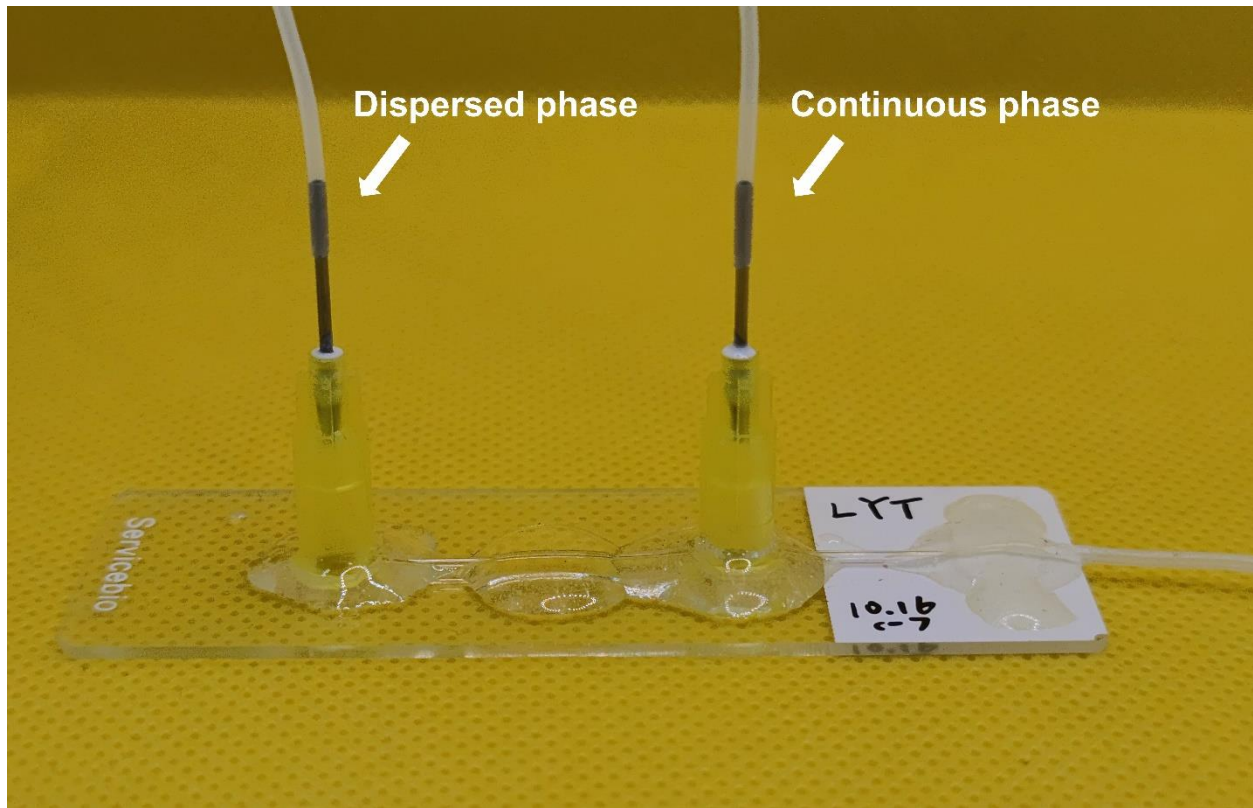

**fig. S5. Photograph of the microfluidic device.** Photo Credit: Yiting Lei, The First Affiliated Hospital of Chongqing Medical University.

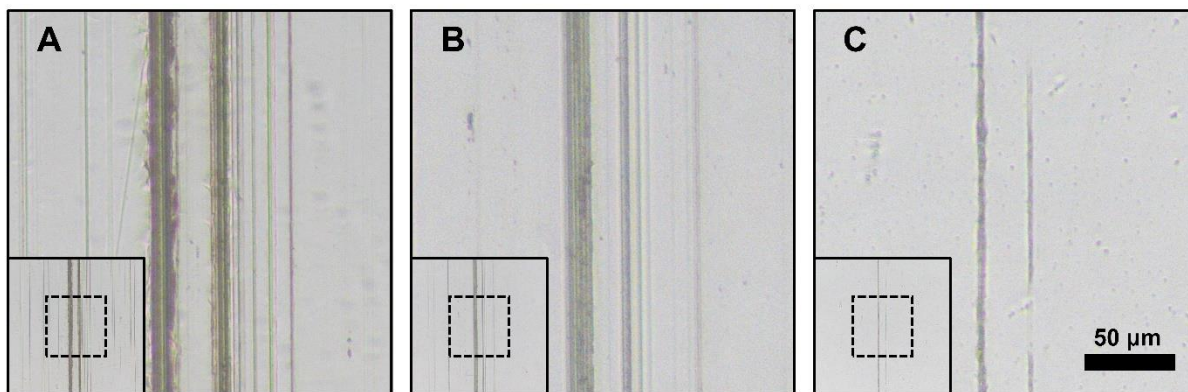

**fig. S6. Bright-field images of the wear track on the disk tested by (A) PBS, (B) HMs, and (C) the worn Lipo@HMs.**

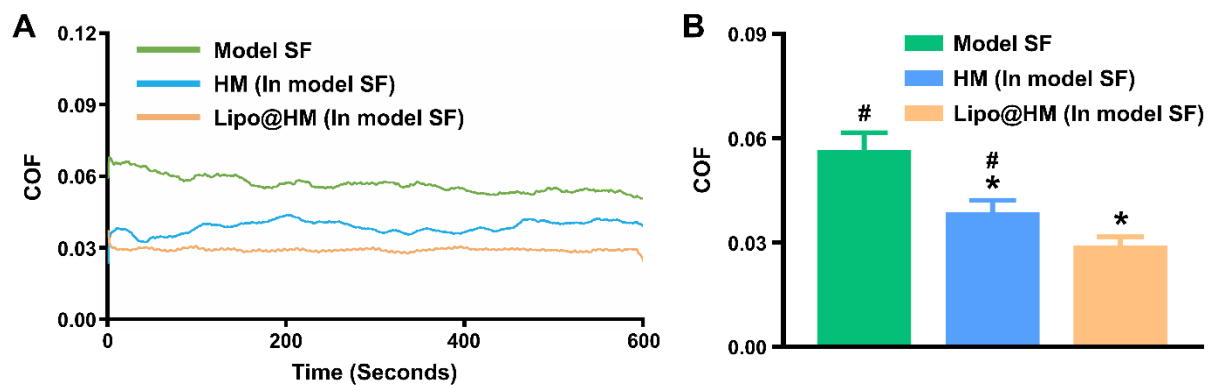

**fig. S7. The lubricating performance in the presence of SF:** (A) COF-time curves and (B) COF histograms for model SF, HMs (in model SF), and the worn Lipo@HMs (in model SF). (# and \* indicated  $P < 0.05$  in comparison with the Lipo@HM and SF groups, respectively).



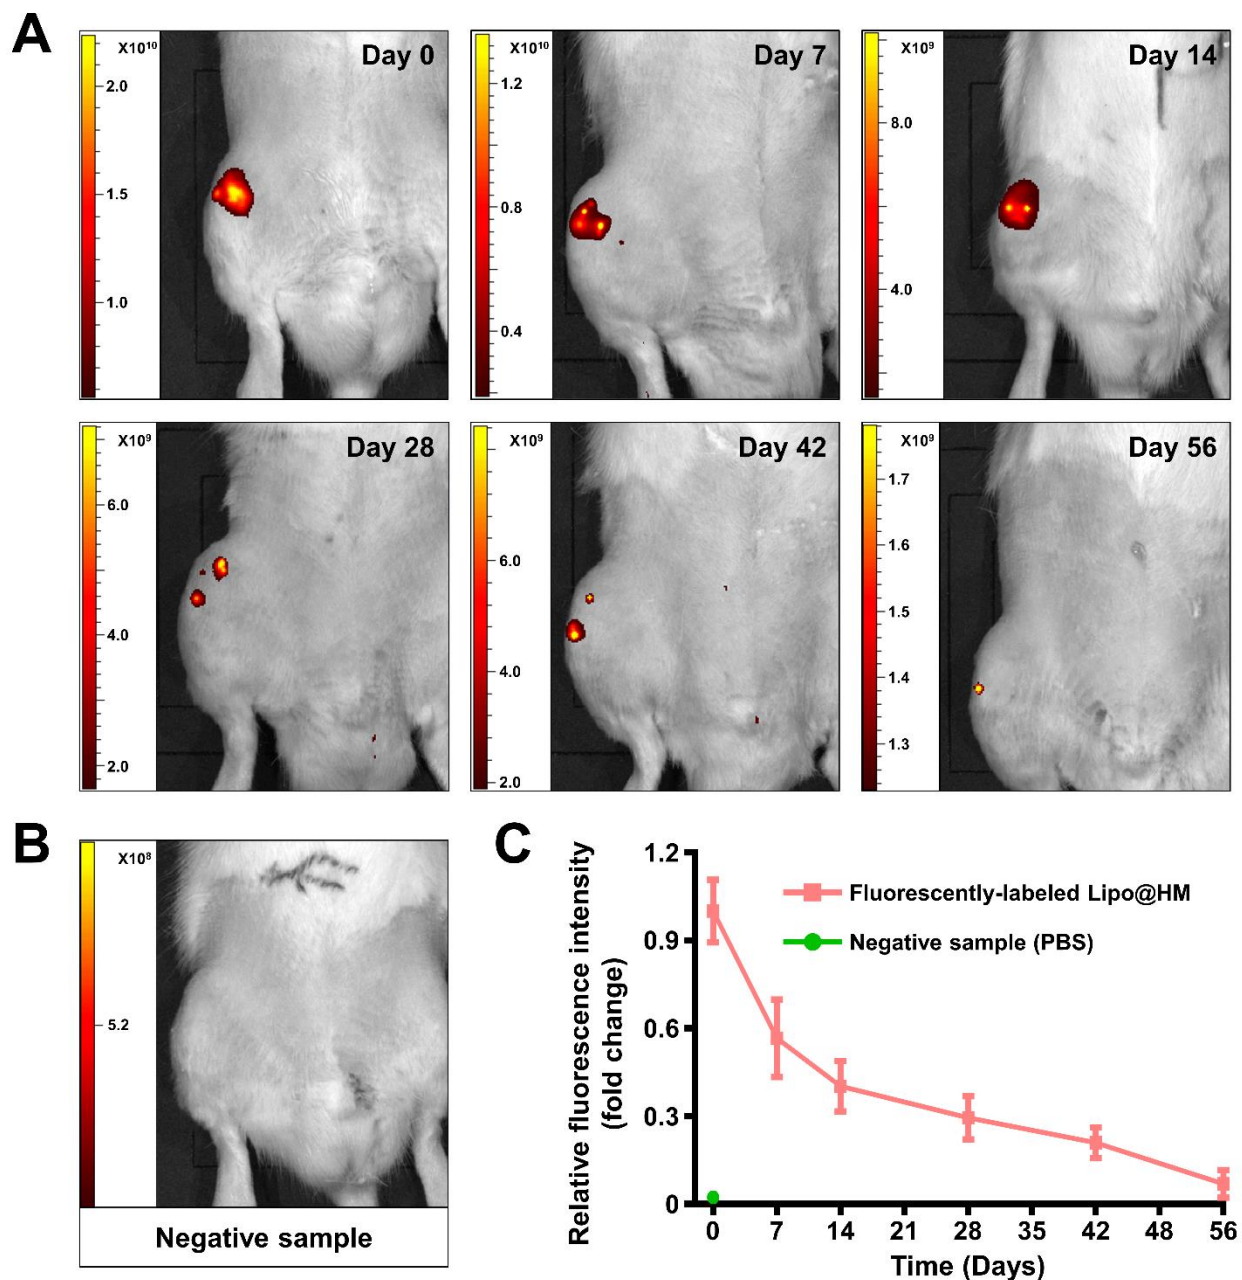

**fig. S8. In vivo retention time:** (A) The IVIS images of fluorescently labeled Lipo@HMs at different time points. (B) The IVIS image of the negative sample. (C) The relative fluorescence intensity at each time points (relative to fluorescently labeled Lipo@HMs on day 0).

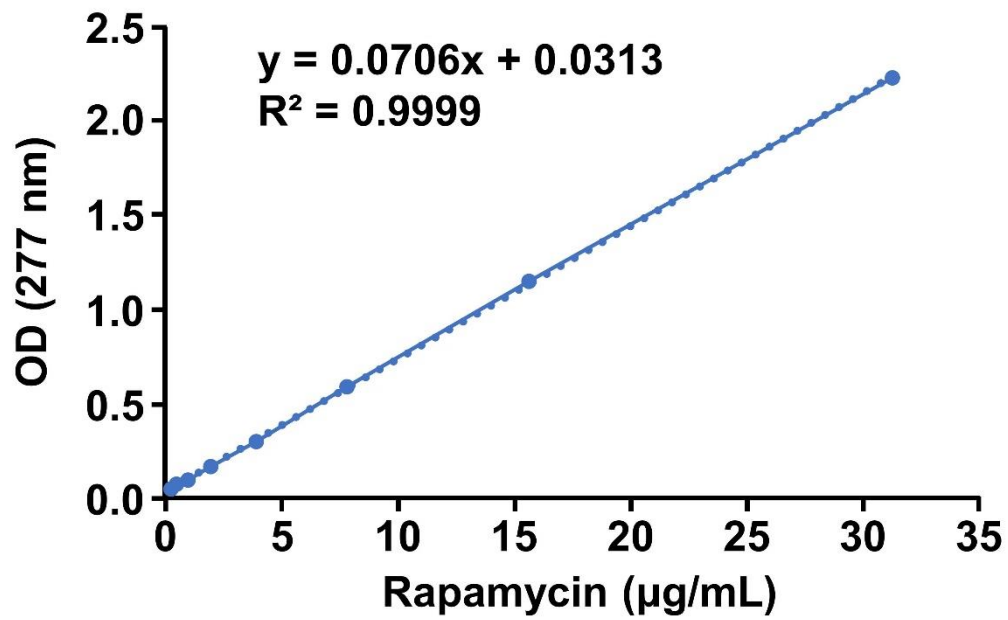

fig. S9. The calibration curve of RAPA with different concentrations.

**Table S1. Primers used in real-time PCR.**

| <b>Gene</b> | <b>Primer</b> | <b>Sequence</b>           |
|-------------|---------------|---------------------------|
| GAPDH       | Forward       | GGAAGCTTGTCATCAATGGAAATC  |
|             | Reverse       | TGATGACCCTTTTGGCTCCC      |
| Col2        | Forward       | CACTCAAGTCCCTCAACAACCAG   |
|             | Reverse       | GGGGTCAATCCAGTAGTCTCCAC   |
| LC3B        | Forward       | CGAACAAAGAGTAGAAGATGTCCGA |
|             | Reverse       | GCTGCTTCTCACCCCTGTATCG    |
| ATG5        | Forward       | GGATGAGATAACTGAAAGGGAAGC  |
|             | Reverse       | CCATTTTCAGTGGTGTGCCTTC    |
| MMP13       | Forward       | GGTGATGAAGATGATTTGTCTGAGG |
|             | Reverse       | CGTCAAGTTTGCCAGTCACCT     |
